# Supplementary material for: Epidemiology of hepatitis B and C virus infections among patients who booked for surgical procedures at Felegehiwot referral hospital, Northwest Ethiopia
Source: PubMed Central journal article supplement (PMC7299365; doi:10.1371/journal.pone.0234822), 2020-06-17
Supplement: pone.0234822.s001.pdf [file pone.0234822.s001.pdf]

**Annex: Questionnaire to assess the risk of getting HBV and HCV infections among pre surgery patients.**

| Sr.No.   | Questions                                                                                                                       | Response category                                                                                                                                   |
|----------|---------------------------------------------------------------------------------------------------------------------------------|-----------------------------------------------------------------------------------------------------------------------------------------------------|
| <b>A</b> | <b>Socio-demographic questions</b>                                                                                              |                                                                                                                                                     |
| 11       | Age in years                                                                                                                    | _____                                                                                                                                               |
| 12       | Sex                                                                                                                             | 1). Male 2). Female                                                                                                                                 |
| 13       | Religion                                                                                                                        | 1). Orthodox 2). Muslim 3). Catholic<br>4). Protestant 5). Other_____                                                                               |
| 14       | Residence                                                                                                                       | 1). Kebele 1.) Urban, 2. Rural)<br>2). District (rural, urban)                                                                                      |
| 15       | Education level                                                                                                                 | 1). No formal education<br>2). Primary school completed (1-8)<br>3). Secondary school completed (9-12)<br>4). Above secondary (College, University) |
| 16       | Marital status                                                                                                                  | 1). Single 2). Married (in union)<br>3). Widowed 4). divorced                                                                                       |
| 17       | Occupation                                                                                                                      | 1). Farmer 2). Employed<br>3). Non-employed                                                                                                         |
| 18       | HIV status                                                                                                                      | 1) Positive 2). Negative<br>3). Unknown                                                                                                             |
| <b>B</b> | <b>Risk assessment questions</b>                                                                                                |                                                                                                                                                     |
| 19       | Have you ever heard about the disease hepatitis?                                                                                | 1). YES 2). No                                                                                                                                      |
| 20       | Do you have experience of multiple sexual intercourses?                                                                         | 1). Yes 2). No                                                                                                                                      |
| 21       | If yes for Q 20, with whom you did sex?                                                                                         | 1). Girlfriends 2). Commercial sex workers<br>3). Wives 4). No status is known                                                                      |
| 22       | When did you do practice multiple practices?                                                                                    | _____                                                                                                                                               |
| 23       | Do you have experience of sharing sharp materials (needle, blade, pin, et.c) with others in the family, relatives or neighbors? | 1). Yes 2). No                                                                                                                                      |

|    |                                                                                     |                                                                                                       |
|----|-------------------------------------------------------------------------------------|-------------------------------------------------------------------------------------------------------|
| 24 | If yes for Q23, did you get injection or cutting with those shared sharp materials? | 1). Yes 2). No 3). Do not remember                                                                    |
| 25 | Did you get blood transfusion from others in your life?                             | 1). Yes 2). No                                                                                        |
| 26 | If yes for Q25, when you did it?                                                    | _____                                                                                                 |
| 27 | Did you practice tooth extraction due to illness?                                   | 1). Yes 2). No                                                                                        |
| 28 | If yes for Q27, where?                                                              | 1). At home 2). Traditional practices<br>3). Clinics 4). Health center<br>5). Hospital 6). Other_____ |
| 29 | Were you admitted at health facilities before?                                      | 1). Yes 2). No                                                                                        |
| 30 | Did you do surgical procedures (minor or major surgery) before?                     | 1). Yes 2). No                                                                                        |
| 31 | Did you come across with others' blood contact with bear hand in your life time?    | 1). Yes 2). No                                                                                        |
| 32 | Did you get needle stick anywhere in your life time?                                | 1). Yes 2). No                                                                                        |
